# Supplementary material
Source: Royal Society of Chemistry journal article supplement (https://www.rsc.org/suppdata/cp/1999/2303/gilli_dep.doc)
Supplement: Supplementary file 1 [file gilli_dep.doc]

**Table *S1a***. Selected bond distances (Å) and angles () and v(MO) IR stretching frequencies (cm-1) for Re(V) oxo- and dioxo-complexes.

---------------------------------------------------------------------------------------------------------------------------------------

Compound *trans*-ligand d(MO) d(M-O) <α> v(MO) Ref.

---------------------------------------------------------------------------------------------------------------------------------------

[ReO2(cyclam)]+ O2- 1.775(9) 1.775(9) 90.0 - a

[ReO2(cyclam)]+ O2- 1.78(1) 1.78(1) 90.4 776 b

[ReO2(en)2]+ O2- 1.761(7) 1.769(7) 90.6 814 c

[ReO2(py)4]+ O2- 1.74(1) 1.78(1) 90.7 814 c

[ReO2(cyclam)]+ O2- 1.756(3) 1.756(3) 90.0 825 d

ReOCl2(OEt)(py)2 EtO- 1.684(7) 1.896(6) 91.9 - e

[ReO(OEt)(PNH)2] (β-form) EtO- 1.717(8) 1.997(8) 95.9 885 f

[ReO(OEt)(PNH)2] (α-form) EtO- 1.692(7) 2.004(7) 96.3 887 g

ReOI2(OEt)(PPh3)2 EtO- 1.715(9) 1.880(9) 92.2 945 h

[ReO(OEt){N(SPPh2)2}2] EtO- 1.70(1) 1.90(1) 90.3 950 i

[ReO(OEt)(Ph2PNPPh2Se)2] EtO- 1.70(2) 1.86(2) 90.5 950 j

ReOCl2(OEt)(PPh3)2 EtO- 1.699(4) 1.888( 4) 91.6 955 k

[ReCl2O(OEt)(Haza)PPh3] EtO- 1.691(6) 1.885(6) 91.8 -- l

[ReOCl2(OC3H7)(PPh3)2] PropO- 1.698(2) 1.890(2) 90.3 -- m

[ReO(OH)(Ocyclam)]+ OH- 1.685(8) 1.970(8) 94.9 952 n

[ReO(OH)(CN)4]2- OH- 1.70(1) 1.90(1) 92.3 -- o

ReOI2(OMe)(PPh3)2 MeO- 1.698(5) 1.859(5) 92.6 930 h

[ReO(OMe)(dppd)] MeO- 1.699(8) 2.011(9) 98.2 915 p

[ReO(acac)(η2-B(pz)4)OMe] MeO- 1.681(5) 1.896(5) 93.1 955 q

[ReO(OMe)L] MeO- 1.679(7) 1.875(6) 92.6 -- r

[cis-(P,P)-ReO(PO)(PO)2] ArO- 1.692(3) 2.050(3) 97.6 965 s

[ReOCl(PO2)] Ar-O- 1.69(1) 2.032(9) 97.7 959 t

[ReOCl(PO)(PNH)] Ar-O- 1.70(1) 2.04(1) 97.5 941 t

[ReOBr(oz)2] Ar-O- 1.681(4) 1.988(4) 94.9 970 u

[ReOCl2 (salampH)] Ar-O- 1.680(7) 1.943(7) 92.4 978 v

Table *S1a*. Cont.

[ReOCl2 (salimp)] Ar-O- 1.695(9) 1.953(9) 92.6 -- v

[ReOClL’2] ArO- 1.688(6) 1.977(5) 94.7 -- w

*trans*-ReOCl2(PPh3)(Me-sal) Ar-O-  1.701(5) 1.949(5) 94.7 -- x

[ReOCl(Me-sal)2] Ar-O- 1.680(4) 1.979(4) 95.1 962 y

*trans*-ReOBr2(PPh3)(Ph-sal) Ar-O- 1.683(5) 1.937(5) 93.9 965 z

*cis*-ReOCl2(PPh3)(Me-sal) Ar-O- 1.660(8) 1.955(6) 94.0 967 x

Re2CL4O2(PPh3)2(salen)2 Ar-O- 1.68(1) 1.92(1) 93.1 969 aa

1.68(1) 1.93(1) 92.7

*trans*-ReOBr2(PPh3)(Ph-sal) Ar-O- 1.680(4) 1.972(4) 95.1 973 ab

(triclinic form)

[ReOClL''] ArO- 1.679(5) 1.994(5) 95.6 952 ac

[ReOClL'''] ArO- 1.680(3) 1.981(3) 94.5 957 ac

[ReO(PPh3)(cat)2]- ArO- 1.693(8) 2.041(7) 92.6 941 ad

[ReOBr3(ma)]- Ar-O- 1.664(5) 2.103(5) 95.4 970 ae

[ReOBr(ma)2] Ar-O- 1.673(8) 2.028(7) 97.3 975 ae

ReOCl2(acac)(PPh3) acac- 1.69(1) 2.10(1) 97.0 -- af

[ReO(O2CCF3)(dppd)] CF3COO- 1.682(6) 2.174(6) 98.5 892 p

[ReO(H2O)Cl2tu2]+ H2O 1.65(1) 2.23(1) 98.3 -- ag

[ReO(H2O)Cl4]- H2O 1.660(9) 2.20(1) 97.7 -- ah

[ReO(H2O)(CN)4]- H2O 1.667(8) 2.142(7) 98.4 -- ai

ReOCl2(PPh3)(Acbhyz) RO- 1.685(8) 2.013(7) 95.9 -- aj

[ReOCl2{N(OPPh2)2}(PPh3)] RO- 1.660(5) 2.071(4) 95.9 960 i

[ReOCl2(OPPh2CH2PPh2)] RO- 1.688(9) 2.137(9) 96.9 965 ak

1.694(9) 2.146(9) 97.1

[ReO(ECH3)] RO- 1.69(1) 2.252(9) 101.2 980 al

[ReOCl(DEBT)2] RO- 1.684(7) 2.138(5) 98.1 -- am

[ReOCl3 (dppmO)] RO- 1.673(5) 2.127(4) 97.4 987 an

[ReOCl3 (OPPh3)(Me3Bzm)] RO- 1.662(6) 2.081(7) 95.9 -- ao

Table *S1a*. Cont.

[{ReOCl2 (DPK.OH)}Cl]- RO- 1.670(6) 1.981(5) 95.8 953 ap

[ReO(MAG2‑oABAH)]‑ - 1.684(4) -- 110.6 966 aq

[ReO(MAG2‑pABAH)]‑ - 1.670(5) -- 111.0 970 aq

[ReO(map)]‑ (syn) - 1.662(5) -- 110.8 970 ar

ReOCl4‑ - 1.64(4) -- 105.2 1033 as

1.62(4) 104.9

ReOCl4‑ - 1.63(2) -- 100.0 1067 at

--------------------------------------------------------------------------------------------------------------------------------------

**cyclam**= 1,4,8,11-tetraazacyclotetradecane; **en**= ethylenediamine; **py**= pyridine; **PNH2**= 2-(diphenylphoshino-*κP*)phenylazanide-*κN*; **N(SPPH2)2**= iminobis (diphenylphosphine sulphide); **Haza**= 7-azaindole; **DEBT**= N,N-diethyl-N'-benzoylthiourea; **dppd**= dianionic form of N,N'-bis[2-(diphenylphosphino)phenyl]propane-1,3-diamine; **acac**= anionic form of acetylacetone; **B(pz)4**= tetrakis(pyrazolyl)borate; **L**= {2'(NC4H3-2-CH=N(CH2)3NMe(CH2)3CH=N-)C4H3NH}; **PO**= anionic form of *o*-hydroxyphenyl-diphenylphosphine; **oz** = anionic form of 2-(2'-hydroxyphenyl)-2-oxazoline; **salampH**= -OC6H4-2-CH2-NH(CH2)3PPh2; **salimp**= -OC6H4-2-CH=N(CH2)3PPh2; **L’**= 2'-HOC6H4CH=NCH2CH2OCH2;  **Me-sal**= N-methylsalicylideneiminate; **Ph-sal**= N-phenyl salicylideneiminate; **salen**= N,N'-ethylenebis(salicylideneiminate); **L''**= 1,3-(N,N'-bis-(3,5-dichlorosalycilidene)diamino)-2,2-dimethylpropyl; **L'''**= 1,3-(N,N'-bis(salycilidene)diamino)-2,2-dimethylpropyl; **cat**= catecholate; **ma**= maltolate; **tu**= thiourea; **Acbhyz**= acetone benzoylhydrazonide; **N(OPPH2)2**= iminobis(diphenylphosphine oxide); **ECH3**= dianionic form of (2R,7R)-2,7-dicarboxy-3,6-diaza-1,8-octanedithiol; **dppmO**= Ph2PCH2P(O)Ph2; **Me3Bzm**= 1,5,6-trimethylbenzilimidazole; **DPK**= di-(2-pyridyl)ketone; **MAG2‑(o,p)ABAH**= mercaptoacetylglycylglycyl-*o,p*-aminobenzoate; **map**= dianionic form of 2,3-bis(mercaptoacetamido)propanoate.

--------------------------------------------------------------------------------------------------------------------------------------

**References** of Table *S1a*

a) PIGBAI: Wang, Y-P.; Che, C-M.; Wong, K-Y.; Peng, J-M. *Inorg. Chem.* **1993**, *32*, 5827-5832;

b) PAJVUR: Luna, S.A.; Bolzati, C.; Duatti, A.; Zucchini, G.L.; Bandoli, G.; Refosco, F. *Inorg. Chem.* **1992**,*31*, 2595-2598;

c) OXPYRE10, REOENC02: Lock,C.J.L.; Turner, G. *Acta Cryst.* **1978**, *B34*, 923-927;

d) GILFAI: Blake, A.J.; Greig, J.A.; Schröder, M. *J. Chem. Soc. Dalton Trans.* **1988**, 2645-2647;

e) OEOPRE: Lock, C.J.L.; Turner, G. *Can. J. Chem.* **1977**, *55*, 333-339;

f) SUHGIL01: Bandoli, G.; Dolmella, A.; Tisato,F.; Refosco, F.  *Acta Cryst.* **1994**, *C50*, 530-532;

g) SUHGIL: Refosco, F.; Tisato, F.; Bandoli, G.; Bolzati, C.; Dolmella, A.; Moresco, A.; Nicolini, M. *J. Chem. Soc. Dalton Trans.* **1993**, 605-618;

h) ZEGHUO, ZEGJAW: Ciani, G.; D'Alfonso, G.; Romiti, P.; Sironi, A.; Freni, M. *Inorg. Chim. Acta* **1983**,  *72*, 29-37;

i) JIFWAW, JIFVOS: Rossi, R.; Marchi, A.; Magon, L.; Casellato, U.; Tamburini, S.; Graziani, R. *J. Chem. Soc. Dalton Trans.* **1991**, 263-268;

j) JOKYUD: Rossi, R.; Marchi, A.; Marvelli, L.; Peruzzini, M.; Casellato, U.; Graziani, R.  *J. Chem. Soc. Dalton Trans*. **1992**, 435-437;

k) BEZFER01: Graziani, R.; Casellato, U.; Rossi, R.; Marchi, A. *J. Cryst. Spectr. Res.* **1985**, *15*, 573-579;

l) WERLEK: Lebuis, A.M.; Beauchamp, A.L. *Acta Crystallogr*., **1994**,  *C50*, 882-884;

m) YUHLUI: Abram, S.; Abram, U.; Schulz-Lang, E.; Strähle, J. *Acta Crystallogr*. **1995**, *C51*, 1078-1080;

n) JUYBEK: Winkler Tsang, B.; Reibenspies, J.; Martell, A.E.  *Inorg. Chem.*  **1993**, *32*, 988-994; o) JAXMAW: Purcell, W; Roodt, A.; Basson, S.S.; Leipoldt, J.G. *Transition Met. Chem*., **1989**, *14*, 5-6;

p) YOMNET, YOMNIX: Tisato, F.; Refosco, F.; Moresco, A.; Bandoli, G.; Dolmella, A.; Bolzati,C. *Inorg. Chem.* **1995**, *34*, 1779-1783;

q) ZURNAB: Paulo, A.; Domingos, A.; Santos, I. *Inorg. Chem.* **1996**, *35*, 1798-1807;

r) JEZCIA: Banbery, H.J.; McQuillan, F.S.; Hamor, T.A.; Jones, C.J.; McCleverty, J.A. *Polyhedron*, **1990**, *9*, 615-618;

s) YUBGOR: Luo,H.; Setyavati, I.; Rettig, S.J.; Orvig, C. *Inorg. Chem.* **1995**, *34*, 2287-2299;

t) NALNOD, NALPEV: Bolzati, C; Tisato, F.; Refosco, F.; Bandoli, G.; Dolmella, A. *Inorg. Chem*. **1996**, *35*, 6221-6229;

u) ZOPYIM: Shuter, E.; Hoveyda, H.R.; Karunaratne, V.; Rettig, S.J.; Orvig, C. *Inorg. Chem*. **1996**, *35*, 368-372;

v) JITKAY, JITKEC: Banbery, H.J.; Hussain, W.; Hamor, T.A.; Jones, C.J.; McCleverty, J.A. *Polyhedron*, **1991**, *10*, 243-247;

w) KAPWON: Banbery, H.J.; McQuillan, F.S.; Hamor, T.A.; Jones, C.J.; McCleverty, J.A. *J. Chem. Soc. Dalton Trans.*, **1989**, 1405-1407;

x) BIMBUU10, CICXER: Bertolasi, V.; Ferretti,V.; Sacerdoti, M.; Marchi, A. *Acta Cryst.* **1984**, *C40*, 971-974;

y) BAXJIT: Gilli, G.; Sacerdoti, M.; Bertolasi, V.; Rossi,R. *Acta Cryst.* **1982**, *B38*, 100-104;

z) BANFAX10: Bertolasi, V.; Sacerdoti, M.; Gilli, G.; Mazzi, U. *Acta Cryst.* **1982**,  *B38*, 426-429; aa) Bombieri,G.; Mazzi, U.; Gilli, G.; Hernandez-Cano, F. *J. Organom. Chem.* **1978**, *159*, 53-62; ab) BANFAX01: Sacerdoti, M.; Bertolasi, V.; Gilli, G.; Duatti, A. *Acta Cryst.* **1984**, *C40*, 968-970;

ac) ZURYUG, ZURZAN: Herrmann, W.A.; Rauch,M.U.; Artus, G.R.J. *Inorg. Chem*., **1996**, *35*, 1988-1991;

ad) HEFYEW: Kettler, P.B.; Chang, Y-D.; Zubieta,J.; Abrams, M.J. *Inorg. Chim. Acta* **1994**, *218*, 157-165;

ae) PIBDUZ, PIBDOT: Luo,H.; Rettig, S.J.; Orvig, C.  *Inorg. Chem.* **1993**, *32*, 4491-4497;

af) XCACRE: Lock, C.J.L.; Wan, C. *Can. J. Chem.* **1975**, *53*, 1548-1553;

ag) OACTUR: Lis, T. *Acta Cryst.* **1976**, *B32*, 2707-2709;

ah) FOAMDS10: Lis, T. *Acta Crystallogr*. **1979**, *B35*, 3041-3044;

ai) VEPHIH: Purcell, W.; Roodt, A.; Basson, S.S.; Leipoldt, J.G. *Transition Met. Chem*., **1990**, *15*, 239-241;

aj) ABHPRE: Hursthouse, M.B.; Jayaweera, S.A.A.; Quick, A. *J. Chem. Soc. Dalton Trans.* **1979**, 279-282;

ak) JUMLUY: Katti, V.K.; Barnes, C.L. *Inorg. Chem*. **1992**, *31*, 4231-4235;

al) YELTUE: Marzilli, L.G.; Banaszczyk, M.G.; Hansen, L.; Kuklenyik, Z.; Cini, R.; Taylor, A. Jr. *Inorg. Chem*. **1994**, *33*, 4850-4860;

am) LALCUW: Dilworth, J.R.; Lewis, J.S.; Miller, J.R.; Zheng, Y. *Polyhedron*, **1993**,*12*, 221-225; an) YAYSUM: Shih, K-Y.; Fanwich, P.E.; Walton, R.A. *Inorg. Chimica Acta*, **1993**,  *212*, 23-29; ao) TAQFUM: Hansen, L.; Alessio, E.; Iwamoto, M.; Marzilli, P.; Marzilli, L.G. *Inorg. Chimica Acta*, **1995**, *240*, 413-417;

ap) POGJGA: Bandoli, G.; Dolmella, A.; Gerber, T.I.A.; du Preez, J.G.H.; Kemp, H.J. *Inorg. Chimica Acta*, **1994**, *217*, 141-147;

aq) VUKLOC, VUKLUI: Hansen, L.; Cini, R.; Taylor, A.Jr.; Marzilli, L.G. *Inorg.Chem.* **1992**, *31*, 2801-2808;

ar) SIDHIW: Rao, T.N.; Adhikesavalu, D.; Camerman, A.; Fritzberg, A.R. *J. Am. Chem. Soc.* **1990**, *112*, 5798-5804;

as) Edwards, A.J. *J. Chem. Soc. Dalton Trans.* **1972**, 582;

at) ASPORC: Lis, T.; Jezowska‑Trzebiatowska, B. *Acta Cryst.* **1977**, B33, 1248-1250.

***Table S1b***. Selected bond distances (Å) and angles () and v(MO) IR stretching frequencies (cm-1) for Tc(V) oxo and dioxo-complexes.

-------------------------------------------------------------------------------------------------------------------------

Compound trans-ligand d(MO) d(M-O) <α> v(MO) Ref.

-------------------------------------------------------------------------------------------------------------------------

[TcO2(cyclam)]+ O2- 1.749(3) 1.754(3) 90.0 790 a

1.754(3) 1.754(3) 90.0

TcO2(pent)(AO)2 O2- 1.743(3) 1.744(3) 90.1 790 b

1.746(3) 1. 742(3) 90.6

[TcO2(TBP)4]+ O2- 1.748(6) 1.748(6) 90.0 821 c

1.737(6) 1.737(6) 90.0

[TcO2(en)2]+ O2- 1.741(1) 1.752(1) 90.7 833 d

TcOBr2(OEt)(Npy)2 EtO- 1.684(6) 1.855(6) 91.1 938 e

[TcO(OMe)(PPh2PhN)2] MeO- 1.700(8) 1.999(8) 96.6 878 f

[TcO(OMe)(dppd)] MeO- 1.691(2) 2.030(2) 98.3 882 g

TcO(aza-sal) Ar-O- 1.685(6) 2.120(6) 99.4 888 h

TcO(apa) Ar-O- 1.678(2) 2.149(2) 99.3 915 i

TcOCl(thoz)2  Ar-O- 1.661(3) 1.978(3) 95.4 935 j

TcOCl(Ph-sal)2 Ar-O- 1.67(1) 1.94(1) 95.1 940 k

[TcOCl3(hbt)]- Ar-O- 1.650(6) 1.948(4) 94.2 945 l

TcO(OPh-sal)(quin) Ar-O- 1.659(7) 2.014(6) 96.4 948 m

TcOCl(Me-quin)2 Ar-O- 1.649(3) 1.994(3) 96.2 945 n

[TcOCl3(ma)]- Ar-O- 1.647(2) 2.019(2) 94.7 965 o

[TcO(ox)2(Hox)]2- RCOO- 1.640(6) 2.069(6) 98.3 963 p

TcO(pam-N,S,O)(pam-N,S) RCOO- 1.657(4) 2.214(4) 100.8 958 q

[TcO(H2O)(acac)2(en)]+ H2O 1.648(2) 2.282(2) 100.8 960 r

[TcO(H2O)(sacac)2(en)]+ H2O 1.643(3) 2.384(2) 101.1 964 s

TcO(glusal)(sal) Ar-CHO 1.656(8) 2.359(8) 102.4 970 t

[TcO(map)]‑ (syn) - 1.656(7) 110.4 945 u

[TcO(map)]‑ (anti) - 1.644(5) 110.8 950 u

[TcO(epa)]‑ - 1.648(3) 104.1 965 v

Table *S1b*. Cont.

[TcO(PIC)] - 1.653(4) 109.2 965 w

[TcOCl(L6)] - 1.645(7) 108.8 980 x

[TcO(OPh-sal)]‑ - 1.634(7) 111.6 980 y

TcOCl4‑ - 1.610(4) 106.8 1016 z

---------------------------------------------------------------------------------------------------------------------------------------

**cyclam**= 1,4,8,11-tetraazacyclotetradecane; **pent(AO)2**= 3,3,11,11-tetramethyl-4,10-diazatridecane-2,12-dione dioximate; **TBP**= 4-*tert*-butylpyridine; **en**= ethylenediamine; **Npy**= 4-nitropyridine;  **dppd**= dianionic form of N,N'-bis[2-(diphenylphosphino)phenyl]propane-1,3-diamine; **aza-sal**= *N,N’*-3-azapentane-1,5-diylbis (salicylideneiminate); **apa**= trianionic form of *N,N*'-azapentane-1,5-diylbis-(3-(1-iminoethyl)-6-methyl-2*H*-pyran-2,4(3*H*)-dione; **thoz**= anionic form of 2-(2'-hydroxyphenyl)-2-thiazoline; **Ph-sal**= N-phenyl salicylideneiminate; **hbt**= anionic form of 2-(2-hydroxypheyl)benzothiazole; **OPh-sal=** anionic form of 2-hydroxy-phenylsalycylideneiminate; **Me-quin**= 2-methyl-8-quinolinolate; **ma**= maltolate; **ox**= oxalate; **pam**= penicillaminate; **(acac)2en**= dianionic form of *N*,*N*’-ethylenebis(acetylacetone iminate);  **(sacac)2en** = dianionic form of *N,N*’-ethylenebis(acetylacetone thioimine);  **glusal**= dianionic form of *N*-salicylidene-D-glucosamine;  **sal**= anionic form of salicylaldehyde; **map**= dianionic form of 2,3-bis (mercaptoacetamido)propanoate; **H4epa**= N,N'-ethylenebis(2-phenoxyacetamide);  **PIC**= N-(2-((2-mercaptoacetyl)amino)ethyl)-2-pyridine carboxamide; **H2L6**= S-methyl-3-(2'-hydroxy-1'-naphtylmethylene)-dithiocarbazate).

----------------------------------------------------------------------------------------------------------------------------------------

**References** of Table *S1b*

a) BAPPIR: Zuckman, S.A.; Freeman, G.M.; Troutner, D.E.; Volkert, W.A.; Holmes, R.A.; Van Derveer, D.G.; Barefield, E.K. *Inorg. Chem.* **1981**, *20*, 2386-2389;

b) FONNOL: Jurisson, S.; Aston, K.; Fair, C.K.; Schlemper, E.O.; Sharp, P.R.; Troutner, D.E. *Inorg. Chem.* **1987**, *26*, 3576-3582;

c) CURVOA: Kastner,M.E.; Fackler, P.H.; Clarke, M.J.; Deutsch, E. *Inorg. Chem.* **1984**, *23*, 4683-4688; d) BEWRIE: Kastner, M.E.; Lindsay, M.J.; Clarke, M.J. *Inorg. Chem.*  **1982**, *21*, 2037;

e) CUHXUY: Fackler, P.H.; Kastner, M.E.; Clarke, M.J. *Inorg. Chem.* **1984**, *23*, 3968-3972;

f) SUHGEH: Refosco, F.; Tisato, F.; Bandoli,G.; Bolzati, C.; Dolmella, A.; Moresco, A.; Nicolini, M.  *J. Chem. Soc. Dalton Trans.* **1993**, 605-618;

g) YOMNAP: Tisato, F.; Refosco, F.; Moresco, A.; Bandoli, G.; Dolmella, A.; Bolzati, C.  *Inorg. Chem.* **1995**, *34*, 1779-1787;

h) FURWUK: Refosco, F.; Tisato, F.; Mazzi, U.; Bandoli, G.; Nicolini, M. *J. Chem. Soc. Dalton Trans.* **1988**, 611-615;

i) SOZVIM: Liu, S.; Rettig, S.J.; Orvig, C. *Inorg. Chem.* **1991**, *30*, 4915-4919;

j) ZOPYEI: Shuter, E.; Hoveyda, H.R.; Karunaratne, V.; Rettig,S.J.; Orvig, C. *Inorg. Chem*. **1996**, *35*, 368-372;

k) BOFJOV: Bandoli, G.; Mazzi, U.; Clemente, D.A.; Roncari, E. *J. Chem. Soc. Dalton Trans.* **1982**, 2455-2459;

l) SADGUZ: Duatti, A.; Marchi, A.; Rossi, R.; Magon, L.; Deutsch, E.; Bertolasi, V.; Bellucci, F. *Inorg. Chem.* **1988**, *27*, 4208-4213;

m) DUDTUR: Mazzi, U.; Refosco, F.; Tisato, F.; Bandoli, G.; Nicolini, M. *J. Chem. Soc. Dalton Trans.* **1986**, 1623-1628;

n) CUMBIV: Wilcox, B.E.; Heeg, M.J.; Deutsch, E. *Inorg. Chem.*  **1984**, *23*, 2962-2967;

o) PIBFAH: Luo, H.; Rettig, S.J.; Orvig, C. *Inorg. Chem.* **1993**,  *32*, 4491-4497;

p) GEBDOG: Baldas, J.; Colmanet, S.F.; Mackay, M.F. *J. Chem. Soc. Dalton*  *Trans.* **1988**, 1725-1731; q) PCLTCA10: Franklin, K.J.; Howard-Lock, H.E.; Lock, C.J.L. *Inorg. Chem.*, **1982**, *21*, 1941-1946;

r) CEPHOU: Jurisson, S.; Lindoy, L.F.; Dancey, K.P.; McPartlin, M.; Tasker, P.A.; Uppal, D.K.; Deutsch, E. *Inorg. Chem.* **1984**, *23*, 227-231;

s) SOXMIB: Stassinopoulou, C.I.; Mastrostamatis, S; Papadopoulos, M; Vavouraki, H.; Terzis, A.; Hountas, A.; Chiotellis, E. *Inorg. Chimica Acta* **1991**, *189*, 219-224;

t) FIRVUX: Duatti, A.; Marchi. A.; Magon, L.; Deutsch, E.; Bertolasi, V.; Gilli, G. *Inorg. Chem.* **1987**, *26*, 2182-2186;

u) SIDHAO, SIDHES: Rao, T.N.; Adhikesavalu, D.; Camerman, A.; Fritzberg, A.R. *J. Am. Chem. Soc.* **1990**, *112*, 5798-5804;

v) JIZBID: Abrams, M.J.; Shaikh, S.N.; Zubieta, J. *Inorg. Chim. Acta* **1991**, *186*, 87-90;

w) SIDTII: Bryson, N.; Lister‑James, J.; Jones, A.G.; Davis, W.M.; Davison, A. *Inorg. Chem.* **1990**,  *29*, 2948-2951;

x) SESZOF: Marchi, A.; Rossi, R.; Magon, L.; Duatti, A.; Pasqualini, R.; Ferretti, V.; Bertolasi, V.  *J.Chem. Soc. Dalton Trans.* **1990**, 1411-1416;

y) COKZAD: Bandoli, G.; Mazzi, U.; Wilcox, B.E.; Jurisson, S.; Deutsch, E. *Inorg. Chim. Acta* **1984**, *95*, 217-223;

z) TPIMCT: Cotton, F.A.; Davison, A.; Day, V.W.; Gage, L.D.; Trop,H.S. *Inorg. Chem.* **1979**, *18*, 3024-3029.

**Table *S2***. Effect of the diaminodithiolate and diaminooxymeoximate equatorial ligands on apical M-O multiple bond (A), mean angle <α> (degrees) and IR v(MO) stretching frequency (cm-1).

Compound *d*(MO) <α> v(MO) Ref.

Re-complexes

ReO(Bn-MAMA’) 1.680(2) 110.5 980 a

*syn*-ReO(Bn-MAMA’) 1.683(4) 110.5 955 a

*syn*-ReO(BAT-PPP) 1.697(6) 110.7 935 b

1.701(6) 110.6

[ReO(EC-3*N*,4*N*)]3- 1.736(7) 109.2 872 c

*Tc-complexes*

*meso*-TcO[CB-PAO] 1.664(5) 110.1 931 a’

TcOPn(AO)2 1.679(3) 109.8 923 b’

TcOPn(AO)(AO-CH3) 1.671(3) 110.0 921 c’

TcOPn(AO-CH3)2  1.677(2) 109.7 920 c’

*syn*-TcO(BAT-PPP) 1.681(2) 110.9 919 d’

*dl*-TcO[(CH3)2Pn(AO-CH3)2] 1.682(5) 109.8 911 c’

*meso*-TcO[(CH3)2Pn(AO-CH3)2] 1.677(3) 110.0 908 c’

1.670(4) 110.1

*anti*-TcO(BAT-PPP) 1.691(8) 111.1 900 d’

1.670(8) 110.7

**Bn-MAMA’**= N-benzyl-monoaminemonoamide; **BAT-PPP**= bis(amino thio)-phenylpiperidine; **EC**= esaanionic form of (2*R*, 7*R*)-2,7-dicarboxy-3,6-diaza-1,8-octanedithiol; **CB-PAO**= 4,8-diaza-3,9-dimethyl-6,6-trimethyleneundecane-2,10-dione dioxime; **Pn**= propylene; **AO**= 3-amino-3-methyl-2-butanone oxime or amine oxime; **Pn(AO)2**= 3,3,9,9-tetramethyl-4,8-diazaundecane-2,10-dione oxime.

a) WEMKOO, WEMKUU: O’Neil, J.P.; Wilson, S.R.; Katzenellenbogen, J.A. *Inorg. Chem*. **1994**, *33*, 319-323; b) WAVGIJ: Francesconi, L.C.; Graczyk, G.; Wehrli, S.; Shaikh, S.N.; McClinton, D.; Liu, S.; Zubieta, J.; Kung, H.F. *Inorg.* *Chem*. **1993**, *32*, 3114-3124; c) YELVAM: Marzilli, L.G.; Banaszczyk, M.G.; Hansen, L.; Kuklenyik, Z.; Cini, R.; Taylor, A. ,Jr. Inorg. Chem. 1994, 33, 4850-4860; a’) ZUGYEF: Tsai, C-S.; Lu, T-H.; Duh, J-Y.; Yeh, S-J. *Acta Crystallogr*. **1996**, *C52*, 838-840; b’) CEWZIN10: Fair, C.K.; Troutner, D.E.; Schlemper, E.O.; Murmann, R.K.; Hoppe, M.L. *Acta Crystallogr.*, **1984**, *C40*, 1544-1546; c’) DORMUS, DORNAZ, DORNED, DORNIH: Jurisson, S.; Schlemper, E.O.; Troutner, D.E.; Canning, L.R.; Nowotnik, D.P.; Neirinckx, R.D. *Inorg. Chem*., **1986**, *25*, 543-549; d’) WAVGAB, WAVGEF: Francesconi, L.C.; Graczyk, G.; Wehrli, S.; Shaikh, S.N.; McClinton, D.; Liu, S.; Zubieta, J.; Kung, H.F. *Inorg.* *Chem*. **1993**, *32*, 3114-3124.

**Table *S3*.** Proton affinities (PA), *pKa* values and *pK*1 values for trans-entering ligands.  *K*1 = first- association equilibrium constant = [ML]/[M][L] where L= ligand and M= metal.

Ligand base Coniugated acid PAa  *pKa*b *pK*1c

Fe3+ Th4+ TcO2+

1 O2- OH- — _21 — — —

2 RCH2O- RCH2OH 376.1 16 — — —

(EtOH)

3 OH- H2O 389.5 14.0* 11.8 10.8 12.6

4 MeO- MeOH 379.2 15.2 — — —

5 ArO- ArOH 351.4 8-11 7.8(phenol) 8.4 —

8.9(cresol)

6 acac- acacH _344 9 9.8 8.8 —

7 RCOO- RCOOH 348.5 4.8 3.4 3.9 —

(AcCOOH)

8 F3CCOO- F3CCOOH 322 0.23 — — —

9 H2O H3O+ 166.5 0.0* — 0.2 —

10 ArCHO ArCHOH+ 199.3 -7 — — —

(*) Values of -1.74 for *pKa* (H3O+) and 15.74 for *pKa* (H2O) were adopted following the procedure described in: Maskill, H. *The Physical Bases of Organic Chemistry*, Oxford Univ. Press: **1985**, pp. 165 and 177.

a Mallard, W.G.; Linstrom, P.J. Eds. ‘*NIST Chemistry WebBook, NIST Standard Reference Database Number 69'*, March 1998.

b Ref. 12b.

c Smith, R.M.; Martell, A.E. Eds. *‘Crytical Stability Constants*’, Plenum Press: New York, 1975-1989; Vols. 3,4,5,6.
